# Supplementary material
Source: PubMed Central journal article supplement (PMC4117411)
Supplement: NIHMS604493-supplement-Online_content.pdf [file NIHMS604493-supplement-Online_content.pdf]

## Supplementary Online Content

Wehner MR, Chren M-M, Nameth D, et al. International prevalence of indoor tanning: a systematic review and meta-analysis. *JAMA Dermatol*. Published online January 29, 2014.  
doi:10.1001/jamadermatol.2013.6896.

eMethods. Supplementary Methods

eTable 1. Study Characteristics

eTable 2. Results of Sensitivity Analyses

eFigure. Results of Meta-Regressions of Past-Year Exposure Prevalence and Year of Data Collection

eReferences

## eMethods

### SUPPLEMENTARY METHODS

#### DATA SOURCES AND LITERATURE SEARCH

Searches of electronic databases were performed using the following search text.

Pubmed: *"indoor tanning" or "sunbed\*" or "tanning bed\*" or "tanning booth\*" or "tanning salon\*" or "solarium\*" or "solaria" or "sunlamp\*" or "artificial tanning" or "UV tanning" or "non-solar ultraviolet radiation" or "non-solar UV radiation" or "nonsolar ultraviolet radiation" or "nonsolar UV radiation."*

Scopus: *TITLE-ABS-KEY("indoor tanning" OR "sunbed\*" OR "tanning bed\*" OR "tanning booth\*" OR "tanning salon\*" OR "solarium\*" OR "solaria" OR "sunlamp\*" OR "artificial tanning" OR "UV tanning" OR "non-solar ultraviolet radiation" OR "non-solar UV radiation" OR "nonsolar ultraviolet radiation" OR "nonsolar UV radiation").*

Web of Science: *TS=("indoor tanning" OR "sunbed\*" OR "tanning bed\*" OR "tanning booth\*" OR "tanning salon\*" OR "solarium\*" OR "solaria" or "sunlamp\*" OR "artificial tanning" OR "UV tanning" OR "non-solar ultraviolet radiation" OR "non-solar UV radiation" OR "nonsolar ultraviolet radiation" OR "nonsolar UV radiation").*

Additionally, we reviewed the articles identified in our database search and relevant review articles to locate published articles missed by the database searches and to locate publicly available data not yet published in the scientific literature. Publicly available data were located by noting named surveys used in the published literature. We searched online for nine named surveys (American Cancer Society Sun Survey, Growing Up Today Survey, National Longitudinal Study of Adolescent Health, National Health Interview Survey Cancer Control Supplement, Youth Risk Behavior Survey, Health Information National Trends Survey, Sunbed-Use: Needs for Action Study, New South Wales Population Health Survey, and New South Wales School Students Health Behaviors Survey) to identify recent iterations of these surveys whose data on indoor tanning prevalence were available publicly but not published in the scientific literature.

#### STUDY SELECTION

In one case, two studies using the same original data were both included. Choi et al<sup>1</sup> and the United States (US) National Cancer Institute (NCI)<sup>2</sup> independently reported on the US Health Information National Trends Survey in 2005. The data available from the NCI<sup>2</sup> reported overall population prevalence, while Choi et al<sup>1</sup> reported gender specific prevalence. These two reports were included in separate meta-analyses (Choi et al<sup>1</sup> when we summarized prevalence according to gender and the NCI<sup>2</sup> when we summarized prevalence overall) and so were both kept in our review.

#### DATA EXTRACTION

Because complete data was not consistently available for all studies, and in order to include as many studies as possible, we made several content-specific decisions that applied to individual studies. These decisions were felt to be the most reasonable course of action after detailed review of manuscripts and discussion by two authors (EL and MRW). The following decisions were made during data abstraction:

- Nielsen et al<sup>3</sup> stated that "the overall use of sunbeds" was "approximately 50%." We used 50% as the ever exposure prevalence estimate.

- For one publicly available record<sup>4</sup>, the number of participants was not available. We obtained this through electronic correspondence with the US National Cancer Institute.
- Koster et al<sup>5</sup> presented prevalences for four distinct data points in an adolescent population but only the total number of adolescent participants was available. We divided that total number of participants by four in order to estimate the number of participants for each data point.
- Savona et al<sup>6</sup> presented a figure showing the prevalence of indoor tanning as a bar graph without any numbers reported. Two reviewers independently visually estimated the prevalence. In one data point out of four, the estimates differed by 2% and the mean was used as the final estimate.
- Zhang et al<sup>7</sup> asked participants if they had ever been exposed to indoor tanning during certain periods of their lives (high school through college and age 25 through 35). We used the higher of the two prevalences reported (that for age 25 through 35) in ever prevalence analyses.
- Veierod et al<sup>8</sup> asked participants aged 30 to 50 about ever exposure to indoor tanning between the ages of 10 and 39, which we used in ever prevalence analyses.
- Unverricht et al<sup>9</sup> asked participants about whether they were exposed to indoor tanning during different seasons in the past year. We used the winter season's estimate, which was the highest prevalence estimate, as the best estimate of exposure in the past year.
- For studies with prevalence results and participant numbers available for females and males separately or for a range of age groups separately<sup>10-18</sup>, we calculated the prevalence for the overall population ourselves using the gender or age group specific prevalences and numbers of participants in each group. In one study<sup>19</sup>, the prevalences for males and females were calculated using the number of participants in each group and the percentages of females and males in participants reporting exposure.

## DATA SYNTHESIS AND STATISTICAL METHODS

### *Primary analyses*

When separating studies into categories for analysis (adults, university students, and children), we prioritized separating study populations into adult and child categories over retaining any age-adjustment or weighting used. Age-adjusted data was available and used for 10 out of 84 records.

We calculated the standard error for each study assuming probability to be a Bernoulli random variable,  $p$ , with variance= $p(1-p)$  in all but three records. In three instances of extremely low prevalences (0% and 3%,<sup>20</sup> 0.3%,<sup>21</sup> all in males) and in one instance of very low prevalence with a small number of participants (7.9% in 38 males)<sup>22</sup> this calculation yielded negative lower confidence intervals. Because negative prevalences are impossible, we used an exact confidence interval calculation as the input into the analyses for these four prevalence data points.

### *Sensitivity analyses*

In the first sensitivity analysis, six studies were included that did not report exposure measures that specifically fit our 'ever exposure' nor 'past year exposure' definitions. A study that reported "use"<sup>23</sup> was included in an ever exposure sensitivity analysis. Studies that reported "regular" use,<sup>24</sup> use at least once per year,<sup>25,26</sup> use in the past six months,<sup>27,28</sup> and use at least once per month,<sup>9</sup> were included in the past year exposure sensitivity analyses.

In the second sensitivity analysis, records of specific occupational groups not representative of the general population were included: pilots and flight attendants,<sup>13</sup> indoor office workers,<sup>29</sup> outdoor workers,<sup>9</sup> and healthcare workers.<sup>7,17,30</sup>

In the third sensitivity analysis, seven studies<sup>5,12,25,31-34</sup> that reported combined results of teenagers (> 15 years old or > 16 years old) and adults that could not be split into child and adult

subgroups were excluded from the adult category. One study<sup>35</sup> reported results from a population of university students and high school students and was excluded from the university students category.

In the fourth sensitivity analysis, we excluded studies of potentially lower methodologic quality. These studies had unclear sampling methods, used convenience sampling, or had a sample size less than 500. Two studies<sup>36,37</sup> had unclear sampling and six studies<sup>6,32,33,38-40</sup> were specifically reported as convenience samples. We also considered analyses of parents or caregivers whose children were enrolled in a study or children whose parents were enrolled in a study,<sup>36,41-44</sup> participants recruited in healthcare settings,<sup>12,22,31,45</sup> pilot studies,<sup>46,47</sup> and school based studies that did not sample more than two schools<sup>21,47-50</sup> as convenience samples. Two studies not excluded for the sampling reasons above were excluded for sample size less than 500.<sup>5,10</sup> This sensitivity analysis was not performed in the university student category because the records in this category almost all contained fewer than 500 participants.

eTable 1: Study characteristics

| Reference                                         | Year published | Year(s) of data collection <sup>a</sup> | Participants in study (N) | % female | Population description                                                                                                  | Ever prevalence |         |         | Past-year prevalence |         |         |
|---------------------------------------------------|----------------|-----------------------------------------|---------------------------|----------|-------------------------------------------------------------------------------------------------------------------------|-----------------|---------|---------|----------------------|---------|---------|
|                                                   |                |                                         |                           |          |                                                                                                                         | Males           | Females | Overall | Males                | Females | Overall |
| <b>USA</b>                                        |                |                                         |                           |          |                                                                                                                         |                 |         |         |                      |         |         |
| Bagdasarov <sup>51</sup>                          | 2008           | 2005                                    | 745                       | --       | Undergraduates <25 years old and not dark skinned                                                                       |                 |         | 95.0%   |                      |         |         |
| Baker <sup>52</sup>                               | 2010           | 2008-2009                               | 227                       | 100%     | Undergraduates 18-30 years old                                                                                          |                 | 69.2%   |         |                      |         |         |
| Bandi <sup>42</sup>                               | 2010           | 1998                                    | 1187                      | --       | Parents of adolescents in the American Cancer Society Sun Survey I <sup>b</sup>                                         |                 |         |         |                      |         | 8.6%    |
|                                                   |                | 2004                                    | 1931                      | 76%      | Parents of adolescents in the American Cancer Society Sun Survey II <sup>b</sup>                                        |                 |         |         | 5.3%                 | 14.8%   | 12.8%   |
| Banerjee <sup>53</sup>                            | 2012           | Pre-2012                                | 551                       | --       | Undergraduates <25 years old                                                                                            |                 |         | 39.6%   |                      |         |         |
| Banks <sup>45</sup>                               | 1992           | 1989                                    | 96                        | 42%      | 16-19 year old patients at a general pediatric clinic <sup>b</sup>                                                      | 16.1%           | 32.5%   | 22.9%   |                      |         |         |
| Basch <sup>54</sup>                               | 2012           | 2009                                    | 139                       | 58%      | Undergraduates 18-25 years old                                                                                          |                 |         | 60.4%   |                      |         |         |
| Bolek-Berquist <sup>38</sup>                      | 2009           | 2004                                    | 184                       | 53%      | 18-40 year olds <sup>b</sup>                                                                                            |                 |         |         |                      |         | 34.8%   |
| Brooks <sup>39</sup>                              | 2006           | 2004                                    | 448                       | 58%      | 18-30 year olds <sup>b</sup>                                                                                            |                 |         |         |                      |         | 33.0%   |
| CDC <sup>c</sup> & NCI <sup>d</sup> <sup>55</sup> | 2012           | 2010                                    | 25233                     | --       | ≥18 year olds in the National Health Interview Survey                                                                   |                 |         |         | 2.2%                 | 8.9%    | 5.6%    |
| Choi <sup>1</sup>                                 | 2010           | 2005                                    | 2869                      | --       | White 18-64 year olds in the Health Information National Trends Survey                                                  |                 |         |         | 6.3%                 | 18.1%   |         |
|                                                   |                |                                         |                           |          | Parents of 9-16 year olds at a general pediatric clinic                                                                 |                 |         |         |                      |         | 49.5%   |
| Cohen <sup>56</sup>                               | 2013           | 2010                                    | 301                       | 93%      | 9-16 year olds at a general pediatric clinic                                                                            |                 |         | 4.3%    |                      |         |         |
|                                                   |                |                                         | 301                       | 53%      | 11-18 year olds in the American Cancer Society Sun Survey I                                                             |                 |         |         |                      |         | 10.1%   |
| Cokkinides <sup>57</sup>                          | 2009           | 1998                                    | 1196                      | --       | 11-18 year olds in the American Cancer Society Sun Survey II                                                            |                 |         |         |                      |         | 11.1%   |
|                                                   |                | 2004                                    | 1613                      | --       | Undergraduates 18-23 years old                                                                                          |                 |         |         | 15.9%                | 56.8%   | 35.0%   |
| Danoff-Burg <sup>58</sup>                         | 2006           | 2003                                    | 164                       | 50%      | White 13-19 year olds in the National Longitudinal Study of Adolescent Health Wave II                                   | 11.2%           | 36.8%   | 24.1%   |                      |         |         |
| Demko <sup>59</sup>                               | 2003           | 1996                                    | 6903                      | 51%      | University students                                                                                                     | 58.3%           | 99.3%   | 88.2%   | 52%                  | 94%     | 83%     |
| Dennis <sup>15</sup>                              | 2009           | Pre-2009                                | 162                       | 73%      | College students <35 years old                                                                                          |                 |         |         |                      |         | 7.3%    |
| Fogel <sup>60</sup>                               | 2012           | 2011                                    | 576                       | 52%      | 12-18 year olds in the Growing Up Today Study (children of the participants of the Nurses Health Study II) <sup>b</sup> |                 |         |         | 2.4%                 | 14.4%   | 9.5%    |
| Geller <sup>44</sup>                              | 2002           | 1999                                    | 10079                     | 59%      | College students 18-25 years old                                                                                        |                 |         |         | 11%                  | 22%     | 17%     |
| Gillen <sup>e</sup> <sup>26</sup>                 | 2012           | Pre-2012                                | 277                       | 53%      | High school students in the Youth Risk Behavior Survey                                                                  |                 |         |         | 6.7%                 | 25.4%   | 15.6%   |
| Guy <sup>61</sup>                                 | 2011           | 2009                                    | 14590                     | 50%      | Adults in the National Health Interview Survey                                                                          |                 |         |         | 10.7%                | 16.1%   | 13.4%   |
| Heckman <sup>11</sup>                             | 2008           | 2005                                    | 29394                     | 52%      | Fair-skinned university students                                                                                        | 46.5%           | 80.0%   | 68.7%   | 21.3%                | 48.5%   | 39.3%   |
| Hillhouse <sup>16</sup>                           | 1999           | Pre-1999                                | 254                       | 66%      | University students                                                                                                     |                 | 55.6%   |         |                      |         |         |
| Hillhouse <sup>62</sup>                           | 2005           | Pre-2005                                | 126                       | 100%     | College students                                                                                                        |                 |         | 53.7%   |                      |         |         |
| Hillhouse <sup>63</sup>                           | 2012           | 2008-2009                               | 296                       | --       | Parents of adolescents in the CITY100 (Controlling Indoor Tanning in Youth) study <sup>b</sup>                          |                 |         | 23.9%   |                      |         |         |
| Hoerster <sup>41</sup>                            | 2007           | 2005                                    | 5274                      | 78%      | 14-17 year olds in the CITY100 (Controlling Indoor Tanning in Youth) study <sup>b</sup>                                 |                 |         |         | 3.5%                 | 18.1%   | 11.2%   |
|                                                   |                | 2005                                    | 5274                      | 53%      | Undergraduate and graduate students                                                                                     |                 |         | 61.0%   |                      |         | 47.0%   |
| Knight <sup>64</sup>                              | 2002           | 1999                                    | 489                       | 70%      | 14-17 year olds                                                                                                         | 12.0%           | 41.5%   | 30.3%   |                      |         |         |
| Lazovich <sup>65</sup>                            | 2004           | 2000                                    | 1273                      | 62%      | ≥18 year olds                                                                                                           | 30.2%           | 44.9%   | 38.0%   |                      |         |         |
| Lazovich <sup>66</sup>                            | 2005           | 2002                                    | 802                       | 55%      | Unknown <sup>b</sup>                                                                                                    |                 |         | 74.0%   |                      |         |         |
| Lazovich <sup>46</sup>                            | 2008           | Pre-2008                                | 24                        | 83%      | Junior high and high school students 12-18 years old                                                                    |                 |         |         |                      |         | 18.0%   |
| Lucci <sup>e</sup> <sup>27</sup>                  | 2001           | 1999-2000                               | 210                       | 44%      | High school students <sup>b</sup>                                                                                       |                 |         |         |                      |         | 12.2%   |
| Ma <sup>47</sup>                                  | 2007           | Pre-2007                                | 369                       | --       | Whites >15 years old <sup>b†</sup>                                                                                      |                 |         | 34.0%   |                      |         |         |
| Mawn <sup>32</sup>                                | 1993           | Pre-1993                                | 477                       | 63%      | High school students                                                                                                    | 7.4%            | 18.5%   | 13.3%   |                      |         |         |
| Mermelstein <sup>67</sup>                         | 1992           | Pre-1992                                | 1703                      | 53%      |                                                                                                                         |                 |         |         |                      |         |         |

©2014 American Medical Association. All rights reserved.

| Reference                          | Year published | Year(s) of data collection <sup>a</sup> | Participants in study (N) | % female | Population                                                                                     | Ever prevalence |         |         | Past-year prevalence |         |         |
|------------------------------------|----------------|-----------------------------------------|---------------------------|----------|------------------------------------------------------------------------------------------------|-----------------|---------|---------|----------------------|---------|---------|
|                                    |                |                                         |                           |          |                                                                                                | Males           | Females | Overall | Males                | Females | Overall |
| MMWR <sup>g 68</sup>               | 2012           | 2010-2011                               | 15425                     | 48%      | Adolescents in the Youth Risk Behavior Survey                                                  |                 |         |         | 6.2%                 | 20.9%   | 13.3%   |
| Moore <sup>22</sup>                | 2003           | 2002                                    | 106                       | 64%      | >18 year old patients at a primary care clinic <sup>b</sup>                                    | 7.9%            | 25.0%   | 19.0%   |                      |         |         |
| Mosher <sup>69</sup>               | 2010           | Pre-2010                                | 421                       | 68%      | College students                                                                               |                 |         | 56.3%   | 24.1%                | 59.5%   | 47.7%   |
| NCI <sup>d 2</sup>                 | n/a            | 2005                                    | 5523                      | --       | ≥18 year olds in the Health Information National Trends                                        |                 |         |         |                      |         | 8.4%    |
|                                    |                | 2007                                    | 7424                      | --       | ≥18 year olds in the Health Information National Trends                                        |                 |         |         |                      |         | 8.8%    |
| NCI <sup>d 4</sup>                 | n/a            | 2005                                    | 3064                      | 49%      | 14-17 year olds in the National Health Interview Survey-Cancer Control Supplement              |                 |         |         | 2.0%                 | 15.5%   | 8.7%    |
|                                    |                | 2008                                    | 2204                      | 49%      | 14-17 year olds in the National Health Interview Survey-Cancer Control Supplement              |                 |         |         | 1.1%                 | 10.2%   | 5.5%    |
|                                    |                | 2010                                    | 2751                      | 49%      | 14-17 year olds in the National Health Interview Survey-Cancer Control Supplement              |                 |         |         | 1.2%                 | 7.9%    | 4.4%    |
| Neenan <sup>70</sup>               | 2012           | 2010                                    | 487                       | 60%      | Community college students >18 years old                                                       | 17.7%           | 50.4%   | 37.2%   |                      |         |         |
| Oliphant <sup>48</sup>             | 1994           | 1991                                    | 1008                      | 52%      | 13-19 year olds <sup>b</sup>                                                                   | 15%             | 51%     | 34%     |                      |         |         |
| Poorsattar <sup>71</sup>           | 2007           | 2005-2006                               | 375                       | 65%      | University students <30 years old                                                              | 17%             | 42%     | 33%     |                      |         |         |
| Reynolds <sup>49</sup>             | 1996           | Pre-1996                                | 465                       | 49%      | European-American 6th graders <sup>b</sup>                                                     |                 |         | 3.3%    |                      |         |         |
| Robinson <sup>e 24</sup>           | 1997           | 1986                                    | 1012                      | 50%      | >18 year olds                                                                                  |                 |         |         |                      |         | 2%      |
|                                    |                | 1996                                    | 1000                      | 53%      | >18 year olds                                                                                  |                 |         |         |                      |         | 6%      |
| Robinson <sup>72</sup>             | 1997           | Pre-1997                                | 658                       | 48%      | 11-19 year olds                                                                                |                 |         |         | 1.2%                 | 16.4%   | 8.5%    |
| Sahn <sup>40</sup>                 | 2012           | 2007                                    | 415                       | 100%     | >18 year olds <sup>b</sup>                                                                     |                 |         |         |                      | 51.3%   |         |
| Savona <sup>6</sup>                | 2005           | 1999-2001                               | 483                       | 47%      | 13-19 year olds <sup>b</sup>                                                                   | 14%             | 27%     |         |                      |         |         |
| Stapleton <sup>73</sup>            | 2008           | Pre-2008                                | 174                       | 72%      | Undergraduates                                                                                 |                 |         |         |                      |         | 42.9%   |
| Stryker <sup>43</sup>              | 2004           | 2000-2001                               | 1284                      | 100%     | Caregivers of adolescents in the Minnesota and Massachusetts Indoor Tanning Study <sup>b</sup> |                 |         |         |                      | 15.4%   |         |
| Woodruff <sup>36</sup>             | 2006           | Pre-2006                                | 94                        | --       | Parents of adolescents <sup>b</sup>                                                            |                 |         | 22.34   |                      |         |         |
|                                    |                | Pre-2006                                | 94                        | --       | 14-17 year olds <sup>b</sup>                                                                   |                 |         | 11.7%   |                      |         |         |
| Zhang <sup>h 7</sup>               | 2012           | 2005                                    | 73494                     | 100%     | Nurses in the Nurses Health Study                                                              |                 | 19.8%   |         |                      |         |         |
| <b>Canada</b>                      |                |                                         |                           |          |                                                                                                |                 |         |         |                      |         |         |
| Genuis <sup>31</sup>               | 2009           | 2001-2007                               | 1411                      | 74%      | Adult and pediatric patients seen in 3 general medical clinics <sup>b</sup>                    |                 |         |         |                      |         | 9.4%    |
| Gordon <sup>19</sup>               | 2009           | 2006                                    | 1202                      | 54%      | Grade 10 students                                                                              | 7.6%            | 19.4%   | 14%     |                      |         |         |
| Rhainds <sup>74</sup>              | 1999           | 1996                                    | 1003                      | 58%      | Whites 18-60 years old                                                                         |                 |         |         | 8.6%                 | 12.8%   | 11.1%   |
| <b>Northern and Western Europe</b> |                |                                         |                           |          |                                                                                                |                 |         |         |                      |         |         |
| <b>UK</b>                          |                |                                         |                           |          |                                                                                                |                 |         |         |                      |         |         |
| Amir <sup>h 30</sup>               | 2000           | 1996                                    | 470                       | 89%      | Adult healthcare employees                                                                     | 29.0%           | 48.0%   | 44.0%   |                      |         |         |
| Hamlet <sup>e 28</sup>             | 2004           | 2003                                    | 1405                      | --       | 8-11 year olds                                                                                 |                 |         |         |                      |         | 6.8%    |
| Jackson <sup>12</sup>              | 1999           | 1995                                    | 3105                      | --       | >16 year old patients at 16 general medical practices <sup>b f</sup>                           |                 |         | 17.0%   |                      |         |         |
| Mackay <sup>37</sup>               | 2007           | Pre-2007                                | 496                       | 50%      | 14-16 year olds <sup>b</sup>                                                                   | 25%             | 60%     | 43%     |                      |         |         |
| Thomson <sup>75</sup>              | 2010           | 2008-2009                               | 3101                      | 49%      | 11-17 year olds in the National Prevalence Study in England                                    | 3.5%            | 8.6%    | 6.0%    |                      |         |         |
|                                    |                | 2008-2009                               | 6209                      | 50%      | 11-17 year olds in the Six Cities Study                                                        | 7.3%            | 14.4%   | 10.8%   |                      |         |         |
| <b>Ireland</b>                     |                |                                         |                           |          |                                                                                                |                 |         |         |                      |         |         |
| Pertl <sup>33</sup>                | 2010           | 2007-2008                               | 590                       | 60%      | 16-26 year olds <sup>b f</sup>                                                                 |                 |         | 11.0%   |                      |         |         |
| <b>Iceland</b>                     |                |                                         |                           |          |                                                                                                |                 |         |         |                      |         |         |
| Rafnsson <sup>h 13</sup>           | 2003           | Pre-2003                                | 1095                      | 78%      | Pilots and cabin attendants                                                                    | 52.3%           | 90.5%   | 82.2%   |                      |         |         |
|                                    |                | Pre-2003                                | 1918                      | 76%      | Sample of general population age and sex matched to the pilots and cabin attendants            | 64.1%           | 87.8%   | 82.2%   |                      |         |         |

| Reference                   | Year published | Year(s) of data collection <sup>a</sup> | Participants in study (N) | % female         | Population                                                                         | Ever prevalence |         |         | Past-year prevalence |         |         |       |
|-----------------------------|----------------|-----------------------------------------|---------------------------|------------------|------------------------------------------------------------------------------------|-----------------|---------|---------|----------------------|---------|---------|-------|
|                             |                |                                         |                           |                  |                                                                                    | Males           | Females | Overall | Males                | Females | Overall |       |
| Denmark                     |                |                                         |                           |                  |                                                                                    |                 |         |         |                      |         |         |       |
| Bentzen <sup>76</sup>       | 2012           | 2011                                    | 5509                      | 50%              | 14-18 year olds                                                                    |                 |         |         | 28%                  | 70%     | 38%     |       |
| Køster <sup>5</sup>         | 2011           | March 2007                              | 3356                      | 57%              | 15-59 year olds <sup>†</sup>                                                       |                 |         | 62.5%   | 21.8%                | 35.9%   | 29.9%   |       |
|                             |                | August 2007                             | 3497                      | 59%              | 15-59 year olds <sup>†</sup>                                                       |                 |         | 59.7%   | 17.2%                | 35.3%   | 27.8%   |       |
|                             |                | 2008                                    | 3915                      | 52%              | 15-59 year olds <sup>†</sup>                                                       |                 |         | 57.6%   | 17.5%                | 35.4%   | 26.7%   |       |
|                             |                | 2009                                    | 3746                      | 50%              | 15-59 year olds <sup>†</sup>                                                       |                 |         | 59.1%   | 16.7%                | 30.1%   | 23.3%   |       |
|                             |                | March 2007                              | 342.25                    | --               | 15-19 year olds                                                                    |                 |         |         |                      |         |         | 50.3% |
|                             |                | August 2007                             | 342.25                    | --               | 15-19 year olds                                                                    |                 |         |         |                      |         |         | 47.4% |
|                             |                | 2008                                    | 342.25                    | --               | 15-19 year olds                                                                    |                 |         |         |                      |         | 44.2%   |       |
|                             |                | 2009                                    | 342.25                    | --               | 15-19 year olds                                                                    |                 |         |         |                      |         | 32.9%   |       |
| Kraru <sup>77</sup>         | 2011           | 2008                                    | 1871                      | 54%              | 8-18 year olds                                                                     |                 |         | 20.8%   |                      |         | 16.5%   |       |
| Savona <sup>6</sup>         | 2005           | 1999-2001                               | 668                       | 53%              | 13-19 year olds <sup>b</sup>                                                       | 52%             | 72%     |         |                      |         |         |       |
| Norway and Sweden           |                |                                         |                           |                  |                                                                                    |                 |         |         |                      |         |         |       |
| Boldeman <sup>78</sup>      | 2001           | 1999                                    | 2684                      | 54%              | 20-50 year olds                                                                    | 51.3%           | 74.9%   | 64.0%   |                      |         |         |       |
| Boldeman <sup>79</sup>      | 2003           | 1993                                    | 1190                      | --               | 14-19 year olds                                                                    | 43.0%           | 70.1%   | 56.1%   |                      |         |         |       |
|                             |                | 1999                                    | 2891                      | --               | 14-19 year olds                                                                    | 19.3%           | 44.8%   | 32.9%   |                      |         |         |       |
| Brandberg <sup>80</sup>     | 1998           | 1996                                    | 2615                      | --               | Adolescents                                                                        |                 |         | 9.9%    |                      |         |         |       |
| Bränström <sup>81</sup>     | 2004           | 2001                                    | 1752                      | 56%              | 18-37 year olds                                                                    |                 |         | 35.0%   |                      |         |         |       |
| Nielsen <sup>3</sup>        | 2012           | 1990-1992                               | 40,000                    | 100%             | 25-64 year olds in the Melanoma Inquiry of Southern Sweden                         |                 | 50%     |         |                      |         |         |       |
| Veierød <sup>8</sup>        | 2010           | 1991-1992                               | 79042                     | 100%             | 30-50 year olds in the Norwegian-Swedish Women's Lifestyle and Health Cohort study |                 | 52.0%   |         |                      |         |         |       |
| Wichstrøm <sup>18</sup>     | 1994           | 1992                                    | 15169                     | 55%              | High school students                                                               |                 |         |         | 34.9%                | 74.9%   | 57.1%   |       |
| Belgium                     |                |                                         |                           |                  |                                                                                    |                 |         |         |                      |         |         |       |
| De Vries <sup>82</sup>      | 2006           | Pre-2006                                | 602                       | 59%              | 14-18 year olds                                                                    |                 |         | 36.5%   |                      |         |         |       |
| Germany                     |                |                                         |                           |                  |                                                                                    |                 |         |         |                      |         |         |       |
| Börner <sup>10</sup>        | 2009           | 2007                                    | 1419                      | 52% <sup>i</sup> | 18-90 year olds                                                                    |                 |         | 28.8%   |                      |         |         |       |
|                             |                | 2007                                    | 81                        | 52% <sup>i</sup> | 14-17 year olds                                                                    |                 |         | 18.5%   |                      |         |         |       |
| Schneider <sup>83</sup>     | 2009           | 2008                                    | 500                       | 49%              | 18-45 year olds in the SUN-Study (Sunbed-Use: Needs for Action-Study)              | 34.8%           | 59.0%   | 46.7%   | 16.0%                | 26.6%   | 21.0%   |       |
| Schneider <sup>14</sup>     | 2012           | 2011-2012                               | 4333                      | 49% <sup>i</sup> | 18-45 year olds in the SUN-Study (Sunbed-Use: Needs for Action-Study)              |                 |         | 42.9%   |                      |         | 15.7%   |       |
|                             |                | 2011-2012                               | 518                       | 49% <sup>i</sup> | 14-17 year olds in the SUN-Study (Sunbed-Use: Needs for Action-Study)              |                 |         | 8.7%    |                      |         | 5.2%    |       |
| Unverricht <sup>e h 9</sup> | 2007           | Pre-2007                                | 149                       | --               | 20-65 year olds with outdoor occupations                                           |                 |         |         |                      |         | 12.8%   |       |
| Austria                     |                |                                         |                           |                  |                                                                                    |                 |         |         |                      |         |         |       |
| Schauberger <sup>e</sup>    | 1992           | 1990                                    | 1500                      | --               | >16 year olds <sup>†</sup>                                                         |                 |         |         |                      |         | 9.8%    |       |
| France                      |                |                                         |                           |                  |                                                                                    |                 |         |         |                      |         |         |       |
| Ezzedine <sup>84</sup>      | 2008           | 2001                                    | 7200                      | 59%              | 35-60 year olds                                                                    | 6%              | 21%     | 15%     |                      |         |         |       |
| Isvy <sup>h 17</sup>        | 2012           | 2010                                    | 570                       | 70%              | 5th or 6th year medical students and first-year medical residents                  | 9.2%            | 15.4%   | 13.5%   |                      |         |         |       |
| Tella <sup>b 21</sup>       | 2012           | 2011                                    | 704                       | 48%              | <18 year olds                                                                      | 0.3%            | 2.7%    | 1.4%    |                      |         |         |       |

©2014 American Medical Association. All rights reserved.

| Reference                   | Year published | Year(s) of data collection <sup>a</sup> | Participants in study (N) | % female | Population                                                                                                  | Ever prevalence |         |         | Past-year prevalence |         |         |
|-----------------------------|----------------|-----------------------------------------|---------------------------|----------|-------------------------------------------------------------------------------------------------------------|-----------------|---------|---------|----------------------|---------|---------|
|                             |                |                                         |                           |          |                                                                                                             | Males           | Females | Overall | Males                | Females | Overall |
| <b>Spain</b>                |                |                                         |                           |          |                                                                                                             |                 |         |         |                      |         |         |
| Galán <sup>85</sup>         | 2011           | 2007                                    | 2007                      | 51%      | 18-64 year olds in El Sistema de Vigilancia de Factores de Riesgo asociados a Enfermedades No Transmisibles |                 |         |         | 1.9%                 | 6.6%    | 4.3%    |
| <b>Italy</b>                |                |                                         |                           |          |                                                                                                             |                 |         |         |                      |         |         |
| Fabbrocini <sup>50</sup>    | 2012           | 2011                                    | 191                       | 61%      | 16-19 year olds <sup>b</sup>                                                                                |                 |         | 40.0%   |                      |         |         |
| Monfrecola <sup>35</sup>    | 2000           |                                         | 764                       | 58%      | High school and university students 16-21 years old <sup>f</sup>                                            |                 |         | 12.3%   |                      |         |         |
| <b>Slovakia</b>             |                |                                         |                           |          |                                                                                                             |                 |         |         |                      |         |         |
| Jakusova <sup>e 23</sup>    | 2012           | 2003                                    | 311                       | --       | College students                                                                                            |                 |         | 39%     |                      |         |         |
|                             |                | 2005                                    | 367                       | --       | College students                                                                                            |                 |         | 30%     |                      |         |         |
|                             |                | 2008                                    | 163                       | --       | College students                                                                                            |                 |         | 13%     |                      |         |         |
| <b>Australia</b>            |                |                                         |                           |          |                                                                                                             |                 |         |         |                      |         |         |
| CER, NSW <sup>j 34</sup>    | n/a            | 2005                                    | 11241                     |          | ≥16 year olds in the New South Wales Population Health Survey                                               |                 |         |         | 2.0%                 | 2.6%    | 2.3%    |
| CER, NSW <sup>j 86,87</sup> | n/a            | 2005                                    | 2618                      | 53%      | 12-17 year olds in the New South Wales School Students Health Behaviors Survey                              |                 |         |         | 11.5%                | 13.3%   | 12.4%   |
|                             |                | 2008                                    | 7448                      | 56%      | 12-17 year olds in the New South Wales School Students Health Behaviors Survey                              |                 |         |         | 7.0%                 | 7.5%    | 7.2%    |
| Francis <sup>20</sup>       | 2010           | 2003/2004                               | 5073                      | 50%      | 18-69 year olds                                                                                             | 6.5%            | 15.4%   | 10.9%   | 1.3%                 | 3.0%    | 2.2%    |
|                             |                | 2006/2007                               | 5085                      | 50%      | 18-69 year olds                                                                                             | 5.5%            | 15.7%   | 10.6%   | 0.9%                 | 2.1%    | 1.5%    |
|                             |                | 2003/2004                               | 699                       | 49%      | 12-17 year olds                                                                                             | 2.8%            | 3.8%    | 3.4%    | 0.3%                 | 2.3%    | 1.2%    |
|                             |                | 2006/2007                               | 652                       | 49%      | 12-17 year olds                                                                                             | 1.5%            | 3.4%    | 2.5%    | 0.0%                 | 1.3%    | 0.6%    |
| Gordon <sup>h 29</sup>      | 2012           | 2009                                    | 2867                      | 60%      | Indoor office workers                                                                                       |                 |         |         |                      |         | 2.5%    |
| Lawler <sup>88</sup>        | 2006           | 2004                                    | 9298                      | 50%      | 20-75 year olds                                                                                             |                 |         | 10.7%   | 0.5%                 | 1.3%    | 1.3%    |
| <b>Unknown</b>              |                |                                         |                           |          |                                                                                                             |                 |         |         |                      |         |         |
| Yoo <sup>89</sup>           | 2009           | Pre-2009                                | 155                       | 0%       | 11-18 year olds                                                                                             | 9.4%            |         |         |                      |         |         |

Entries listed by region, country, alphabetically by reference, date of publication, and date of data collection.

n/a indicates not applicable (i.e. study not published and has no publication date)

-- indicates data not available

<sup>a</sup> 'Pre' indicates that no specific date of data collection was available

<sup>b</sup> Unclear or convenience sampling. Excluded in the sensitivity analysis that excluded studies of potentially lower methodologic quality.

<sup>c</sup> United States Centers for Disease Control (CDC)

<sup>d</sup> United States National Cancer Institute (NCI)

<sup>e</sup> Studies that reported exposure measures that did not specifically fit our 'ever exposure' nor 'past year exposure' definitions and were not included in primary analyses but only in sensitivity analyses.

<sup>f</sup> Studies that reported combined results of children (> 15 years or > 16 years) and adults or children and university students that could not be split into subgroups. These were included in the adult category or the university student category for primary analysis and were removed in a sensitivity analysis.

<sup>g</sup> Morbidity and Mortality Weekly Report Surveillance Summary (MMWR)

<sup>h</sup> Studies that assessed specific occupational groups and were not included in primary analyses but only in sensitivity analyses.

<sup>i</sup> Percent female of the entire study, not specific to the population subset listed on this row

<sup>j</sup> Center for Epidemiology and Research, New South Wales Department of Health (CER, NSW)



eTable 2: Results of sensitivity analyses

| <b>Ever exposure</b>      |                                                                                       | <b>Summary prevalence (95% CI)</b> | <b>No. of records</b> |
|---------------------------|---------------------------------------------------------------------------------------|------------------------------------|-----------------------|
| Adults                    | Primary analysis                                                                      | 35.7% (27.5%-44.0%)                | 22                    |
|                           | <i>Sensitivity - inclusion of occupational group records</i>                          | 38.9% (30.1%-47.8%)                | 26                    |
|                           | <i>Sensitivity - exclusion of records that included participants &lt;18 years old</i> | 32.0% (24.8%-39.2%)                | 15                    |
|                           | <i>Sensitivity - exclusion of records of lower methodologic quality<sup>a</sup></i>   | 38.7% (27.4%-49.9%)                | 14                    |
| University students       | Primary analysis                                                                      | 55.0% (33.0%-77.1%)                | 11                    |
|                           | <i>Sensitivity - inclusion of non-standard measures<sup>b</sup></i>                   | 49.1% (29.9%-68.3%)                | 14                    |
|                           | <i>Sensitivity - exclusion of records that included high school students</i>          | 59.3% (41.6%-77.0%)                | 10                    |
| Adolescents               | Primary analysis                                                                      | 19.3% (14.7%-24.0%)                | 23                    |
|                           | <i>Sensitivity - exclusion of records of lower methodologic quality<sup>a</sup></i>   | 19.2% (13.5%-24.8%)                | 14                    |
| <b>Past year exposure</b> |                                                                                       |                                    |                       |
| Adults                    | Primary analysis                                                                      | 14.0% (11.5%-16.5%)                | 21                    |
|                           | <i>Sensitivity - inclusion of non-standard measures<sup>b</sup></i>                   | 12.9% (10.7%-15.2%)                | 25                    |
|                           | <i>Sensitivity - inclusion of occupational group records</i>                          | 13.4% (11.0%-15.8%)                | 23                    |
|                           | <i>Sensitivity - exclusion of records that included participants &lt;18 years old</i> | 11.3% (8.8%-13.8%)                 | 15                    |
|                           | <i>Sensitivity - exclusion of records of lower methodologic quality<sup>a</sup></i>   | 12.7% (9.8%-15.5%)                 | 16                    |
| University students       | Primary analysis                                                                      | 43.1% (21.7%-64.5%)                | 7                     |
|                           | <i>Sensitivity - inclusion of non-standard measures<sup>b</sup></i>                   | 39.8% (21.5%-58.2%)                | 8                     |
| Adolescents               | Primary analysis                                                                      | 18.3% (12.6%-24.0%)                | 23                    |
|                           | <i>Sensitivity - inclusion of non-standard measures<sup>b</sup></i>                   | 17.8% (12.4%-23.2%)                | 25                    |
|                           | <i>Sensitivity - exclusion of records of lower methodologic quality<sup>a</sup></i>   | 13.3% (6.4%-20.3%)                 | 17                    |

<sup>a</sup> Records with lower methodologic quality were those with unclear sampling, convenience sampling, or sample sizes less than 500.

<sup>b</sup> Non-standard measures were those that did not specifically fit our 'ever exposure' nor 'past year exposure' categories.

eFigure. Results of meta-regressions of past-year exposure prevalence and year of data collection

a. Adults

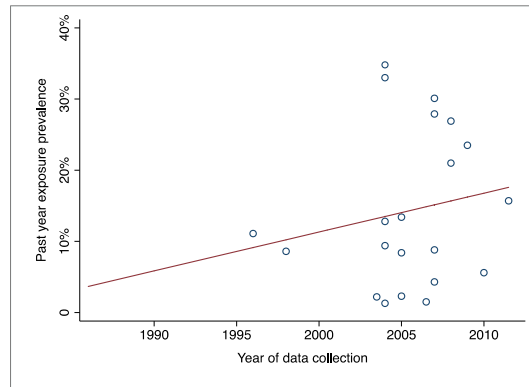

b. University students

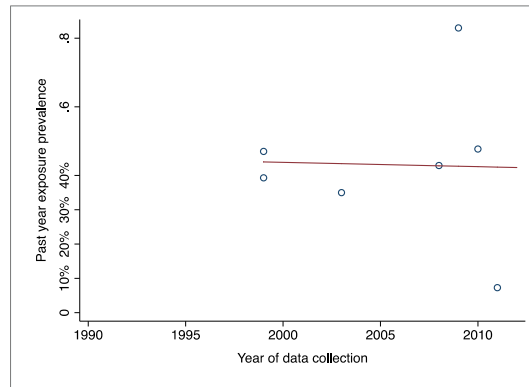

c. Adolescents

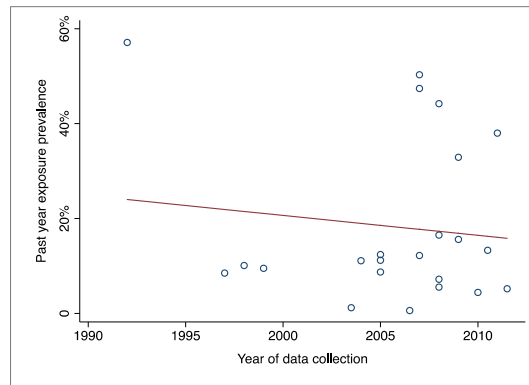

Each circle represents a data point. Red lines represent the result of a meta-regression. All p-values >0.05.

## eREFERENCES

1. Choi K, Lazovich D, Southwell B, Forster J, Rolnick SJ, Jackson J. Prevalence and characteristics of indoor tanning use among men and women in the United States. *Archives of dermatology*. Dec 2010;146(12):1356-1361.
2. National Cancer Institute. Health Information National Trends Survey 2005 & 2007. <http://hints.cancer.gov/question-details.aspx?dataset=2005&method=cati&qid=805>; <http://hints.cancer.gov/question-details.aspx?dataset=2007&method=combined&qid=805>. Accessed January 23, 2013.
3. Nielsen K, Måsbäck A, Olsson H, Ingvar C. A prospective, population-based study of 40,000 women regarding host factors, UV exposure and sunbed use in relation to risk and anatomic site of cutaneous melanoma. *International Journal of Cancer*. // 2012;131(3):706-715.
4. National Cancer Institute. Cancer Trends Progress Report - 2011/2012 Update. [http://progressreport.cancer.gov/doc\\_detail.asp?pid=1&did=2011&chid=101&coid=1011&mid](http://progressreport.cancer.gov/doc_detail.asp?pid=1&did=2011&chid=101&coid=1011&mid). Accessed January 23, 2013.
5. Køster B, Thorgaard C, Philip A, Clemmensen IH. Sunbed use and campaign initiatives in the Danish population, 2007-2009: A cross-sectional study. *Journal of the European Academy of Dermatology and Venereology*. // 2011;25(11):1351-1355.
6. Savona MR, Jacobsen MD, James R, Owen MD. Ultraviolet radiation and the risks of cutaneous malignant melanoma and non-melanoma skin cancer: perceptions and behaviours of Danish and American adolescents. *European journal of cancer prevention : the official journal of the European Cancer Prevention Organisation (ECP)*. Feb 2005;14(1):57-62.
7. Zhang MF, Qureshi AA, Geller AC, Frazier L, Hunter DJ, Han JL. Use of Tanning Beds and Incidence of Skin Cancer. *Journal of Clinical Oncology*. May 2012;30(14):1588-1593.
8. Veierød MB, Adami HO, Lund E, Armstrong BK, Weiderpass E. Sun and solarium exposure and melanoma risk: Effects of age, pigmentary characteristics, and nevi. *Cancer Epidemiology Biomarkers and Prevention*. // 2010;19(1):111-120.
9. Unverricht I, Knuschke P. Behavior of outdoor workers concerning solar UV exposure in occupation and leisure time. *Verhalten von im freien beschäftigten gegenüber solarer UV-strahlung in beruf und alltag*. // 2007;55(4):159-166.
10. Börner FU, Schütz H, Wiedemann P. A population-based survey on tanning bed use in Germany. *BMC dermatology*. // 2009;9:6.
11. Heckman CJ, Coups EJ, Manne SL. Prevalence and correlates of indoor tanning among US adults. *Journal of the American Academy of Dermatology*. May 2008;58(5):769-780.
12. Jackson A, Wilkinson C, Pill R. Moles and melanomas - who's at risk, who knows, and who cares? A strategy to inform those at high risk. *British Journal of General Practice*. Mar 1999;49(440):199-203.
13. Rafnsson V, Hrafnkelsson J, Tulinius H, Sigurgeirsson B, Olafsson JH. Risk factors for cutaneous malignant melanoma among aircrews and a random sample of the population. *Occupational and environmental medicine*. Nov 2003;60(11):815-820.
14. Schneider S, Diehl K, Bock C, et al. Sunbed Use, User Characteristics, and Motivations for Tanning: Results From the German Population-Based SUN-Study 2012. *Archives of dermatology*. Oct 15 2012:1-7.
15. Dennis LK, Kancherla V, Snetselaar LG. Adolescent attitudes towards tanning: does age matter? *Pediatric health*. Dec 1 2009;3(6):565-578.

16. Hillhouse J, Turrisi R, Holwiski F, McVeigh S. An examination of psychological variables relevant to artificial tanning tendencies. *Journal of health psychology*. Jul 1999;4(4):507-516.
17. Isvy A, Beauchet A, Saiag P, Mahé E. Medical students and sun prevention: Knowledge and behaviours in France. *Journal of the European Academy of Dermatology and Venereology*. // 2012.
18. Wichstrøm L. Predictors of Norwegian Adolescents' Sunbathing and Use of Sunscreen. *Health Psychology*. // 1994;13(5):412-420.
19. Gordon D, Guenther L. Tanning behavior of London-area youth. *Journal of cutaneous medicine and surgery*. Jan-Feb 2009;13(1):22-32.
20. Francis K, Dobbinson S, Wakefield M, Girgis A. Solarium use in Australia, recent trends and context. *Australian and New Zealand journal of public health*. Aug 2010;34(4):427-430.
21. Tella E, Beauchet A, Vouldoukis I, et al. French teenagers and artificial tanning. *Journal of the European Academy of Dermatology and Venereology : JEADV*. Oct 19 2012.
22. Moore J, Zelen D, Hafeez I, Ganti AK, Beal J, Potti A. Risk-awareness of cutaneous malignancies among rural populations. *Medical Oncology*. 2003;20(4):369-373.
23. Jakusova V, Capova K, Poljacek I, Cap I, Jakus J. Ultraviolet radiation - Level of knowledge and health protection of college students in Slovakia. An educational-questionnaire study. *Komunikacie*. // 2012;14(1):89-95.
24. Robinson JK, Rigel DS, Amonette RA. Trends in sun exposure knowledge, attitudes, and behaviors: 1986 to 1996. *Journal of the American Academy of Dermatology*. Aug 1997;37(2 Pt 1):179-186.
25. Schauburger G, Keck G, Cabaj A. Spread and use of solaria in Austria. *VERBREITUNG UND NUTZUNG VON SOLARIEN IN OSTERREICH*. // 1992;18(9-10):303-308.
26. Gillen MM, Markey CN. The role of body image and depression in tanning behaviors and attitudes. *Behavioral medicine (Washington, D.C.)*. 2012;38(3):74-82.
27. Lucci A, Citro HW, Wilson L. Assessment of knowledge of melanoma risk factors, prevention, and detection principles in Texas teenagers. *The Journal of surgical research*. May 15 2001;97(2):179-183.
28. Hamlet N, Kennedy K. Reconnaissance study of sunbed use by primary school children in Lanarkshire. *Journal of public health (Oxford, England)*. Mar 2004;26(1):31-33.
29. Gordon LG, Hirst NG, Green AC, Neale RE. Tanning behaviors and determinants of solarium use among indoor office workers in Queensland, Australia. *Journal of health psychology*. Sep 2012;17(6):856-865.
30. Amir Z, Wright A, Kernohan EEM, Hart G. Attitudes, beliefs and behaviour regarding the use of sunbeds amongst healthcare workers in Bradford. *European Journal of Cancer Care*. Jun 2000;9(2):76-79.
31. Genuis SJ, Schwalfenberg GK, Hiltz MN, Vaselenak SA. Vitamin D status of clinical practice populations at higher latitudes: analysis and applications. *International journal of environmental research and public health*. Jan 2009;6(1):151-173.
32. Mawn VB, Fleischer AB, Jr. A survey of attitudes, beliefs, and behavior regarding tanning bed use, sunbathing, and sunscreen use. *Journal of the American Academy of Dermatology*. Dec 1993;29(6):959-962.

- 33.** Pertl M, Hevey D, Thomas K, Craig A, Chuinneagain SN, Maher L. Differential effects of self-efficacy and perceived control on intention to perform skin cancer-related health behaviours. *Health education research*. Oct 2010;25(5):769-779.
- 34.** Centre for Epidemiology and Research. 2005 Report on Adult Health from the New South Wales Population Health Survey. 2006. <http://www0.health.nsw.gov.au/pubs/2006/pdf/adultreport2005.pdf>. Accessed January 23, 2013.
- 35.** Monfrecola G, Fabbrocini G, Posteraro G, Pini D. What do young people think about the dangers of sunbathing, skin cancer and sunbeds? A questionnaire survey among Italians. *Photodermatology Photoimmunology & Photomedicine*. Feb 2000;16(1):15-18.
- 36.** Woodruff SI, Mayer JA, Clapp E. Effects of an introductory letter on response rates to a teen/parent telephone health survey. *Evaluation review*. Dec 2006;30(6):817-823.
- 37.** Mackay H, Lowe D, Edwards D, Rogers SN. A survey of 14 to 16 year olds as to their attitude toward and use of sunbeds. *Health Education Journal*. // 2007;66(2):141-152.
- 38.** Bolek-Berquist J, Elliott ME, Gangnon RE, et al. Use of a questionnaire to assess vitamin D status in young adults. *Public health nutrition*. Feb 2009;12(2):236-243.
- 39.** Brooks K, Brooks D, Dajani Z, et al. Use of artificial tanning products among young adults. *Journal of the American Academy of Dermatology*. Jun 2006;54(6):1060-1066.
- 40.** Sahn RE, McIlwain MJ, Magee KH, Veledar E, Chen SC. A Cross-sectional Study Examining the Correlation Between Sunless Tanning Product Use and Tanning Beliefs and Behaviors. *Archives of Dermatology*. Apr 2012;148(4):448-454.
- 41.** Hoerster KD, Mayer JA, Woodruff SI, Malcarne V, Roesch SC, Clapp E. The influence of parents and peers on adolescent indoor tanning behavior: findings from a multi-city sample. *Journal of the American Academy of Dermatology*. Dec 2007;57(6):990-997.
- 42.** Bandi P, Cokkinides VE, Weinstock MA, Ward E. Sunburns, sun protection and indoor tanning behaviors, and attitudes regarding sun protection benefits and tan appeal among parents of U.S. adolescents-1998 compared to 2004. *Pediatric dermatology*. Jan-Feb 2010;27(1):9-18.
- 43.** Stryker JE, Lazovich D, Forster JL, Emmons KM, Sorensen G, Demierre MF. Maternal/female caregiver influences on adolescent indoor tanning. *The Journal of adolescent health : official publication of the Society for Adolescent Medicine*. Dec 2004;35(6):528 e521-529.
- 44.** Geller AC, Colditz G, Oliveria S, et al. Use of sunscreen, sunburning rates, and tanning bed use among more than 10 000 US children and adolescents. *Pediatrics*. // 2002;109(6):1009-1014.
- 45.** Banks BA, Silverman RA, Schwartz RH, Tunnessen WW, Jr. Attitudes of teenagers toward sun exposure and sunscreen use. *Pediatrics*. Jan 1992;89(1):40-42.
- 46.** Lazovich D, Stryker JE, Mayer JA, et al. Measuring nonsolar tanning behavior: indoor and sunless tanning. *Archives of dermatology*. Feb 2008;144(2):225-230.
- 47.** Ma F, Collado-Mesa F, Hu S, Kirsner RS. Skin cancer awareness and sun protection behaviors in white Hispanic and white non-Hispanic high school students in Miami, Florida. *Archives of dermatology*. Aug 2007;143(8):983-988.
- 48.** Oliphant JA, Forster JL, McBride CM. The use of commercial tanning facilities by suburban Minnesota adolescents. *American journal of public health*. Mar 1994;84(3):476-478.
- 49.** Reynolds KD, Blaum JM, Jester PM, Weiss H, Soong SJ, Diclemente RJ. Predictors of sun exposure in adolescents in a southeastern U.S. population. *The Journal of adolescent health : official publication of the Society for Adolescent Medicine*. Dec 1996;19(6):409-415.

- 50.** Fabbrocini G, Mazzella C, Marasca C, De Vita V, Savastano R, Monfrecola G. Sunbathing and sunlamp exposure: awareness and risk among Italian teenagers. *Photodermatology, photoimmunology & photomedicine*. Aug 2012;28(4):224-225.
- 51.** Bagdasarov Z, Banerjee S, Greene K, Campo S. Indoor tanning and problem behavior. *Journal of American college health : J of ACH*. Mar-Apr 2008;56(5):555-561.
- 52.** Baker MK, Hillhouse JJ, Liu XF. The Effect of Initial Indoor Tanning With Mother on Current Tanning Patterns. *Archives of Dermatology*. Dec 2010;146(12):1427-1428.
- 53.** Banerjee SC, Hay JL, Greene K. College students' cognitive rationalizations for tanning bed use: an exploratory study. *Archives of dermatology*. Jun 2012;148(6):761-762.
- 54.** Basch CH, Hillyer GC, Basch CE, Neugut AI. Improving understanding about tanning behaviors in college students: a pilot study. *Journal of American college health : J of ACH*. 2012;60(3):250-256.
- 55.** Centers for Disease Control. National Health Interview Survey. <http://www.cdc.gov/nchs/nhis.htm>. Accessed February 8, 2013.
- 56.** Cohen L, Brown J, Haukness H, Walsh L, Robinson JK. Sun protection counseling by pediatricians has little effect on parent and child sun protection behavior. *Journal of Pediatrics*. // 2013;162(2):381-386.
- 57.** Cokkinides V, Weinstock M, Lazovich D, Ward E, Thun M. Indoor tanning use among adolescents in the US, 1998 to 2004. *Cancer*. Jan 1 2009;115(1):190-198.
- 58.** Danoff-Burg S, Mosher CE. Predictors of tanning salon use: behavioral alternatives for enhancing appearance, relaxing and socializing. *Journal of health psychology*. May 2006;11(3):511-518.
- 59.** Demko CA, Borawski EA, Debanne SM, Cooper KD, Stange KC. Use of indoor tanning facilities by white adolescents in the United States. *Archives of pediatrics & adolescent medicine*. Sep 2003;157(9):854-860.
- 60.** Fogel J, Krausz F. Watching reality television beauty shows is associated with tanning lamp use and outdoor tanning among college students. *Journal of the American Academy of Dermatology*. // 2012.
- 61.** Guy GP, Jr., Tai E, Richardson LC. Use of indoor tanning devices by high school students in the United States, 2009. *Preventing chronic disease*. Sep 2011;8(5):A116.
- 62.** Hillhouse J, Stapleton J, Turrisi R. Association of frequent indoor UV tanning with seasonal affective disorder. *Archives of dermatology*. Nov 2005;141(11):1465.
- 63.** Hillhouse JJ, Baker MK, Turrisi R, et al. Evaluating a measure of tanning abuse and dependence. *Archives of dermatology*. Jul 2012;148(7):815-819.
- 64.** Knight JM, Kirincich AN, Farmer ER, Hood AF. Awareness of the risks of tanning lamps does not influence behavior among college students. *Archives of dermatology*. Oct 2002;138(10):1311-1315.
- 65.** Lazovich D, Forster J, Sorensen G, et al. Characteristics associated with use or intention to use indoor tanning among adolescents. *Archives of pediatrics & adolescent medicine*. Sep 2004;158(9):918-924.
- 66.** Lazovich D, Sweeney C, Forster J. Prevalence of indoor tanning use in Minnesota, 2002. *Archives of dermatology*. Apr 2005;141(4):523-524.
- 67.** Mermelstein RJ, Riesenber LA. Changing knowledge and attitudes about skin cancer risk factors in adolescents. *Health Psychology*. // 1992;11(6):371-376.

©2014 American Medical Association. All rights reserved.

- 68.** Centers for Disease Control. Use of indoor tanning devices by adults--United States, 2010. *MMWR. Morbidity and mortality weekly report*. May 11 2012;61(18):323-326.
- 69.** Mosher CE, Danoff-Burg S. Indoor tanning, mental health, and substance use among college students: the significance of gender. *Journal of health psychology*. Sep 2010;15(6):819-827.
- 70.** Neenan A, Lea CS, Lesesky EB. Reasons for tanning bed use: a survey of community college students in North Carolina. *North Carolina medical journal*. Mar-Apr 2012;73(2):89-92.
- 71.** Poorsattar SP, Hornung RL. UV light abuse and high-risk tanning behavior among undergraduate college students. *Journal of the American Academy of Dermatology*. Mar 2007;56(3):375-379.
- 72.** Robinson JK, Rademaker AW, Sylvester JA, Cook B. Summer sun exposure: knowledge, attitudes, and behaviors of Midwest adolescents. *Preventive medicine*. May-Jun 1997;26(3):364-372.
- 73.** Stapleton J, Turrisi R, Hillhouse J. Peer crowd identification and indoor artificial UV tanning behavioral tendencies. *Journal of health psychology*. Oct 2008;13(7):940-945.
- 74.** Rhainds M, De Guire L, Claveau J. A population-based survey on the use of artificial tanning devices in the Province of Quebec, Canada. *Journal of the American Academy of Dermatology*. Apr 1999;40(4):572-576.
- 75.** Thomson CS, Woolnough S, Wickenden M, Hiom S, Twelves CJ. Sunbed use in children aged 11-17 in England: face to face quota sampling surveys in the National Prevalence Study and Six Cities Study. *BMJ (Clinical research ed.)*. 2010;340:c877.
- 76.** Bentzen J, Krarup AF, Castberg IM, Jensen PD, Philip A. Determinants of sunbed use in a population of Danish adolescents. *European journal of cancer prevention : the official journal of the European Cancer Prevention Organisation (ECP)*. Aug 14 2012.
- 77.** Krarup AF, Køster B, Thorgaard C, Philip A, Clemmensen IH. Sunbed use by children aged 8-18 years in Denmark in 2008: A cross-sectional study. *British Journal of Dermatology*. // 2011;165(1):214-216.
- 78.** Boldeman C, Bränström R, Dal H, et al. Tanning habits and sunburn in a Swedish population age 13-50 years. *European Journal of Cancer*. // 2001;37(18):2441-2448.
- 79.** Boldeman C, Jansson B, Dal H, Ullén H. Sunbed use among Swedish adolescents in the 1990s: A decline with an unchanged relationship to health risk behaviors. *Scandinavian Journal of Public Health*. // 2003;31(3):233-237.
- 80.** Brandberg Y, Ullén H, Sjöberg L, Holm LE. Sunbathing and sunbed use related to self-image in a randomized sample of Swedish adolescents. *European Journal of Cancer Prevention*. // 1998;7(4):321-329.
- 81.** Bränström R, Ullén H, Brandberg Y. Attitudes, subjective norms and perception of behavioural control as predictors of sun-related behaviour in Swedish adults. *Preventive Medicine*. // 2004;39(5):992-999.
- 82.** De Vries H, Willems K, Mesters I, Reubsæet A. Skin cancer prevention behaviours during summer holidays in 14 and 18-year-old Belgian adolescents. *European journal of cancer prevention : the official journal of the European Cancer Prevention Organisation (ECP)*. Oct 2006;15(5):431-438.
- 83.** Schneider S, Zimmermann S, Diehl K, Breitbart EW, Greinert R. Sunbed use in German adults: risk awareness does not correlate with behaviour. *Acta dermato-venereologica*. 2009;89(5):470-475.

- 84.** Ezzedine K, Malvy D, Mauger E, et al. Artificial and natural ultraviolet radiation exposure: beliefs and behaviour of 7200 French adults. *Journal of the European Academy of Dermatology and Venereology* : JEADV. Feb 2008;22(2):186-194.
- 85.** Galán I, Rodríguez-Laso Á, Díez-Gañán L, Cámara E. Prevalence and correlates of skin cancer risk behaviors in Madrid (Spain). *Prevalencia y factores relacionados con las conductas de riesgo de cáncer de piel en Madrid (España)*. // 2011;25(1):44-49.
- 86.** Centre for Epidemiology and Research. New South Wales School Students Health Behaviours Survey: 2005 Report. <http://www0.health.nsw.gov.au/publichealth/surveys/hss/index.asp>. Accessed January 23, 2013.
- 87.** Centre for Epidemiology and Research. New South Wales School Students Health Behaviours Survey: 2008 Report. <http://www0.health.nsw.gov.au/publichealth/surveys/hss/index.asp>. Accessed January 23, 2013.
- 88.** Lawler SP, Kvaskoff M, DiSipio T, et al. Solaria use in Queensland, Australia. *Australian and New Zealand journal of public health*. Oct 2006;30(5):479-482.
- 89.** Yoo JJ. Peer influence on adolescent boys' appearance management behaviors. *Adolescence*. // 2009;44(176):1017-1031.
